# Supplementary material for: Hair Follicle-Related MicroRNA-34a Serum Expression and rs2666433A/G Variant in Patients with Alopecia: A Cross-Sectional Analysis
Source: MDPI journal article supplement (doi:10.3390/biom12050602), 2022-04-19
Supplement: s1 [file s1]

**Supplementary Table S1.** Stratified analysis by sex for genotype frequencies between cases and controls

|     | <b>Males</b>    |              |                          |                             | <b>Females</b>  |              |                    |                             |                             |
|-----|-----------------|--------------|--------------------------|-----------------------------|-----------------|--------------|--------------------|-----------------------------|-----------------------------|
|     | <b>Controls</b> | <b>Cases</b> | <b>Crude OR (95% CI)</b> | <b>Adjusted OR (95% CI)</b> | <b>Controls</b> | <b>Cases</b> | <b>OR (95% CI)</b> | <b>Adjusted OR (95% CI)</b> | <b><i>P</i> interaction</b> |
| G/G | 125             | 108          | 1.00                     | 1.00                        | 31              | 18           | 1.00               | 1.00                        | 0.24                        |
| A/G | 62              | 83           | <b>1.55 (1.02–2.35)</b>  | <b>1.81 (1.08–3.02)</b>     | 14              | 10           | 1.23 (0.45–3.34)   | 1.88 (0.59–6.00)            |                             |
| A/A | 5               | 17           | <b>3.94 (1.41–11.02)</b> | <b>3.67 (1.14–11.82)</b>    | 0               | 4            | ---                | ---                         |                             |

Values are shown as numbers (%). A Chi-square test was used. OR (95% CI), odds ratio, and confidence interval. Bold *p*-values < 0.05 were considered statistically significant. Adjusted covariates: age, sex, BMI, occupation, residency, and family history.
